# Supplementary material for: Genome-wide interaction analysis of menopausal hormone therapy use and breast cancer risk among 62,370 women
Source: PubMed Central journal article supplement (PMC9007944; doi:10.1038/s41598-022-10121-2), 2022-04-13
Supplement: 41598_2022_10121_MOESM1_ESM.pdf [file 41598_2022_10121_MOESM1_ESM.pdf]

## Supplemental Materials

### Genome-wide interaction analysis of menopausal hormone therapy use and breast cancer risk among 62,370 women

Xiaoliang Wang<sup>\*1,2</sup>, Pooja Middha Kapoor<sup>3,4</sup>, Paul L. Auer<sup>5,6</sup>, Joe Dennis<sup>7</sup>, Alison M. Dunning<sup>8</sup>, Qin Wang<sup>7</sup>, Michael Lush<sup>7</sup>, Kyriaki Michailidou<sup>7,9,10</sup>, Manjeet K. Bolla<sup>7</sup>, Kristan J. Aronson<sup>11</sup>, Rachel A. Murphy<sup>12,13</sup>, Angela Brooks-Wilson<sup>14,15</sup>, Derrick G. Lee<sup>13,16</sup>, Emilie Cordina-Duverger<sup>17</sup>, Pascal Guénel<sup>17</sup>, Thérèse Truong<sup>17</sup>, Claire Mulot<sup>18</sup>, Lauren R. Teras<sup>19</sup>, Alpa V. Patel<sup>19</sup>, Laure Dossus<sup>20</sup>, Rudolf Kaaks<sup>3</sup>, Reiner Hoppe<sup>21,22</sup>, Wing-Yee Lo<sup>21,22</sup>, Thomas Brüning<sup>23</sup>, Ute Hamann<sup>24</sup>, Kamila Czene<sup>25</sup>, Marike Gabrielson<sup>25</sup>, Per Hall<sup>25,26</sup>, Mikael Eriksson<sup>25</sup>, Audrey Jung<sup>3</sup>, Heiko Becher<sup>27</sup>, Fergus J. Couch<sup>28</sup>, Nicole L. Larson<sup>29</sup>, Janet E. Olson<sup>29</sup>, Kathryn J. Ruddy<sup>30</sup>, Graham G. Giles<sup>31,32,33</sup>, Robert J. MacInnis<sup>31,32</sup>, Melissa C. Southey<sup>31,33,34</sup>, Loic Le Marchand<sup>35</sup>, Lynne R. Wilkens<sup>36</sup>, Christopher A. Haiman<sup>37</sup>, Håkan Olsson<sup>38</sup>, Annelie Augustinsson<sup>38</sup>, Ute Krüger<sup>38</sup>, Philippe Wagner<sup>38</sup>, Christopher Scott<sup>29</sup>, Stacey J. Winham<sup>39</sup>, Celine M. Vachon<sup>40</sup>, Charles M. Perou<sup>40</sup>, Andrew F. Olshan<sup>41</sup>, Melissa A. Troester<sup>41</sup>, David J. Hunter<sup>42,43</sup>, Heather A. Eliassen<sup>43,44</sup>, Rulla M. Tamimi<sup>43,45</sup>, Kristen Brantley<sup>44</sup>, Irene L. Andrulis<sup>46,47</sup>, Jonine Figueroa<sup>48,49,50</sup>, Stephen J. Chanock<sup>50</sup>, Thomas U. Ahearn<sup>50</sup>, Montserrat García-Closas<sup>50</sup>, Gareth D. Evans<sup>51,52</sup>, William G. Newman<sup>51,52</sup>, Elke M. van Veen<sup>51,52</sup>, Anthony Howell<sup>53</sup>, Alicja Wolk<sup>54,55</sup>, Niclas Håkansson<sup>54</sup>, Hoda Anton-Culver<sup>56</sup>, Argyrios Ziogas<sup>56</sup>, Michael E. Jones<sup>57</sup>, Nick Orr<sup>58</sup>, Minouk J. Schoemaker<sup>57</sup>, Anthony J. Swerdlow<sup>57,59</sup>, Cari M. Kitahara<sup>60</sup>, Martha Linet<sup>60</sup>, Ross L. Prentice<sup>2</sup>, Douglas F. Easton<sup>7,8</sup>, Roger L. Milne<sup>31,32,33</sup>, Peter Kraft<sup>43,61</sup>, Jenny Chang-Claude<sup>3,62</sup>, Sara Lindström<sup>1,2</sup>

\* Corresponding author: Xiaoliang Wang; [xwang23@fredhutch.org](mailto:xwang23@fredhutch.org)

#### Affiliations:

<sup>1</sup> University of Washington School of Public Health, Department of Epidemiology, Seattle, WA, USA.

<sup>2</sup> Fred Hutchinson Cancer Research Center, Public Health Sciences Division, Seattle, WA, USA.

<sup>3</sup> German Cancer Research Center (DKFZ), Division of Cancer Epidemiology, Heidelberg, Germany.

<sup>4</sup> University of Heidelberg, Faculty of Medicine, Heidelberg, Germany.

<sup>5</sup> Fred Hutchinson Cancer Research Center, Cancer Prevention Program, Seattle, WA, USA.

<sup>6</sup> University of Wisconsin-Milwaukee, Zilber School of Public Health, Milwaukee, WI, USA.

<sup>7</sup> University of Cambridge, Centre for Cancer Genetic Epidemiology, Department of Public Health and Primary Care, Cambridge, UK.

<sup>8</sup> University of Cambridge, Centre for Cancer Genetic Epidemiology, Department of Oncology, Cambridge, UK.

<sup>9</sup> The Cyprus Institute of Neurology & Genetics, Biostatistics Unit, Nicosia, Cyprus.

<sup>10</sup> The Cyprus Institute of Neurology & Genetics, Cyprus School of Molecular Medicine, Nicosia, Cyprus.

<sup>11</sup> Queen's University, Department of Public Health Sciences, and Cancer Research Institute, Kingston, ON, Canada.

<sup>12</sup> University of British Columbia, School of Population and Public Health, Vancouver, BC, Canada.

<sup>13</sup> BC Cancer, Cancer Control Research, Vancouver, BC, Canada.

<sup>14</sup> BC Cancer Agency, Genome Sciences Centre, Vancouver, BC, Canada.

<sup>15</sup> Simon Fraser University, Department of Biomedical Physiology and Kinesiology, Burnaby, BC, Canada.

<sup>16</sup> St. Francis Xavier University, Department of Mathematics and Statistics, Antigonish, NS, Canada.

<sup>17</sup> INSERM, University Paris-Saclay, Center for Research in Epidemiology and Population Health (CESP), Team Exposome and Heredity, Villejuif, France.

<sup>18</sup> INSERM UMR-S1147, Université Paris Sorbonne, Paris, France.

<sup>19</sup> American Cancer Society, Department of Population Science, Atlanta, GA, USA.

<sup>20</sup> International Agency for Research on Cancer (IARC-WHO), Nutrition and Metabolism Branch, Lyon, France.

<sup>21</sup> Dr. Margarete Fischer-Bosch-Institute of Clinical Pharmacology, Stuttgart, Germany.

<sup>22</sup> University of Tübingen, Tübingen, Germany.

<sup>23</sup> Institute of the Ruhr University Bochum (IPA), Institute for Prevention and Occupational Medicine of the German Social Accident Insurance, Bochum, Germany.

<sup>24</sup> German Cancer Research Center (DKFZ), Molecular Genetics of Breast Cancer, Heidelberg, Germany.

- <sup>25</sup> Karolinska Institutet, Department of Medical Epidemiology and Biostatistics, Stockholm, Sweden.
- <sup>26</sup> Södersjukhuset, Department of Oncology, Stockholm, Sweden.
- <sup>27</sup> University Medical Center Hamburg-Eppendorf, Institute of Medical Biometry and Epidemiology, Hamburg, Germany.
- <sup>28</sup> Mayo Clinic, Department of Laboratory Medicine and Pathology, Rochester, MN, USA.
- <sup>29</sup> Mayo Clinic, Department of Health Sciences Research, Rochester, MN, USA.
- <sup>30</sup> Mayo Clinic, Department of Oncology, Rochester, MN, USA.
- <sup>31</sup> Cancer Council Victoria, Cancer Epidemiology Division, Melbourne, Victoria, Australia.
- <sup>32</sup> The University of Melbourne, Centre for Epidemiology and Biostatistics, Melbourne School of Population and Global Health, Melbourne, Victoria, Australia.
- <sup>33</sup> Monash University, Precision Medicine, School of Clinical Sciences at Monash Health, Clayton, Victoria, Australia.
- <sup>34</sup> The University of Melbourne, Department of Clinical Pathology, Melbourne, Victoria, Australia.
- <sup>35</sup> University of Hawaii Cancer Center, Epidemiology Program, Honolulu, HI, USA.
- <sup>36</sup> University of Hawaii Cancer Center, Cancer Epidemiology Program, Honolulu, HI, USA.
- <sup>37</sup> University of Southern California, Department of Preventive Medicine, Keck School of Medicine, Los Angeles, CA, USA.
- <sup>38</sup> Lund University, Department of Cancer Epidemiology, Clinical Sciences, Lund, Sweden.
- <sup>39</sup> Mayo Clinic, Department of Health Sciences Research, Division of Biomedical Statistics and Informatics, Rochester, MN, USA.
- <sup>40</sup> Mayo Clinic, Department of Health Science Research, Division of Epidemiology, Rochester, MN, USA.
- <sup>40</sup> University of North Carolina at Chapel Hill, Department of Genetics, Lineberger Comprehensive Cancer Center, Chapel Hill, NC, USA.
- <sup>41</sup> University of North Carolina at Chapel Hill, Department of Epidemiology, Gillings School of Global Public Health and UNC Lineberger Comprehensive Cancer Center, Chapel Hill, NC, USA.
- <sup>42</sup> University of Oxford, Nuffield Department of Population Health, Oxford, UK.
- <sup>43</sup> Harvard T.H. Chan School of Public Health, Department of Epidemiology, Boston, MA, USA.
- <sup>44</sup> Brigham and Women's Hospital and Harvard Medical School, Channing Division of Network Medicine, Department of Medicine, Boston, MA, USA.
- <sup>44</sup> Weill Cornell Medicine, Department of Population Health Sciences, New York, NY, USA.
- <sup>46</sup> Lunenfeld-Tanenbaum Research Institute of Mount Sinai Hospital, Fred A. Litwin Center for Cancer Genetics, Toronto, ON, Canada.
- <sup>47</sup> University of Toronto, Department of Molecular Genetics, Toronto, ON, Canada.
- <sup>48</sup> The University of Edinburgh, Usher Institute of Population Health Sciences and Informatics, Edinburgh, UK.
- <sup>49</sup> The University of Edinburgh, Cancer Research UK Edinburgh Centre, Edinburgh, UK.
- <sup>50</sup> National Cancer Institute, National Institutes of Health, Department of Health and Human Services, Division of Cancer Epidemiology and Genetics, Bethesda, MD, USA.
- <sup>51</sup> University of Manchester, Manchester Academic Health Science Centre, Division of Evolution and Genomic Sciences, School of Biological Sciences, Faculty of Biology, Medicine and Health, Manchester, UK.
- <sup>52</sup> St Mary's Hospital, Manchester University NHS Foundation Trust, Manchester Academic Health Science Centre, North West Genomics Laboratory Hub, Manchester Centre for Genomic Medicine, Manchester, UK.
- <sup>53</sup> University of Manchester, Division of Cancer Sciences, Manchester, UK.
- <sup>54</sup> Karolinska Institutet, Institute of Environmental Medicine, Stockholm, Sweden.
- <sup>55</sup> Uppsala University, Department of Surgical Sciences, Uppsala, Sweden.
- <sup>56</sup> University of California Irvine, Department of Medicine, Genetic Epidemiology Research Institute, Irvine, CA, USA.
- <sup>57</sup> The Institute of Cancer Research, Division of Genetics and Epidemiology, London, UK.
- <sup>58</sup> Queen's University Belfast, Centre for Cancer Research and Cell Biology, Belfast, Ireland, UK.
- <sup>59</sup> The Institute of Cancer Research, Division of Breast Cancer Research, London, UK.
- <sup>60</sup> National Cancer Institute, Radiation Epidemiology Branch, Division of Cancer Epidemiology and Genetics, Bethesda, MD, USA.
- <sup>61</sup> Harvard T.H. Chan School of Public Health, Program in Genetic Epidemiology and Statistical Genetics, Boston, MA, USA.
- <sup>62</sup> University Medical Center Hamburg-Eppendorf, Cancer Epidemiology Group, University Cancer Center Hamburg (UCCH), Hamburg, Germany.

**Table S1. Demographics characteristics of postmenopausal women in participating studies**

| Study        | Study Design                  | Cases         |                   |                 |                 | Controls      |                   |                 |                 |
|--------------|-------------------------------|---------------|-------------------|-----------------|-----------------|---------------|-------------------|-----------------|-----------------|
|              |                               | N             | Age, Mean         | Current MHT use | Current EPT use | N             | Age, Mean (SD)    | Current MHT use | Current EPT use |
| CBCS         | Population-based case-control | 379           | 63.6 (8.1)        | 0.15            | 0.06            | 506           | 62.8 (8.1)        | 0.16            | 0.08            |
| CECILE       | Population-based case-control | 519           | 61.2 (7.2)        | 0.17            | 0.13            | 604           | 61.2 (7.3)        | 0.14            | 0.11            |
| CPSII        | Prospective cohort            | 2,362         | 62.5 (5.8)        | 0.44            | 0.20            | 3,113         | 62.3 (5.9)        | 0.39            | 0.12            |
| EPIC         | Prospective cohort            | 1,680         | 59.0 (5.5)        | 0.31            | 0.26            | 1,766         | 58.7 (5.4)        | 0.31            | 0.23            |
| GENICA       | Population-based case-control | 691           | 62.6 (8.6)        | 0.27            | 0.13            | 533           | 62.7 (8.7)        | 0.30            | 0.12            |
| KARMA        | Prospective cohort            | 836           | 64.6 (6.7)        | 0.10            | NA              | 4,153         | 63.9 (6.2)        | 0.05            | NA              |
| MARIE        | Population-based case-control | 1,483         | 63.8 (5.5)        | 0.44            | 0.28            | 1,850         | 62.7 (5.5)        | 0.35            | 0.21            |
| MCBCS        | Mixed                         | 973           | 63.3 (10.2)       | 0.19            | 0.19            | 981           | 62.1 (9.8)        | 0.25            | 0.14            |
| MCCS         | Prospective cohort            | 794           | 66.6 (8.5)        | 0.22            | NA              | 874           | 65.5 (8.1)        | 0.17            | NA              |
| MEC          | Prospective cohort            | 591           | 64.4 (8.6)        | 0.59            | 0.35            | 618           | 64.8 (7.7)        | 0.47            | 0.21            |
| MISS         | Prospective cohort            | 217           | 58.4 (6.0)        | 0.27            | NA              | 591           | 57.1 (5.2)        | 0.18            | NA              |
| MMHS         | Prospective cohort            | 216           | 64.6 (8.8)        | 0.25            | 0.07            | 460           | 63.3 (10.9)       | 0.28            | 0.05            |
| NCBCS        | Population-based case-control | 1,075         | 60.0 (9.1)        | 0.25            | 0.10            | 596           | 59.9 (9.0)        | 0.44            | 0.15            |
| NHS          | Prospective cohort            | 890           | 66.6 (8.0)        | 0.40            | 0.18            | 1,513         | 67.6 (8.4)        | 0.28            | 0.10            |
| NHS2         | Prospective cohort            | 508           | 54.7 (4.4)        | 0.39            | 0.23            | 770           | 52.7 (5.0)        | 0.45            | 0.15            |
| OFBCR        | Mixed                         | 666           | 58.5 (8.2)        | 0.32            | NA              | 287           | 57.3 (6.4)        | 0.52            | NA              |
| PBCS         | Population-based case-control | 1,276         | 59.9 (8.3)        | 0.12            | 0.11            | 1,390         | 60.5 (7.4)        | 0.07            | 0.05            |
| PKARMA       | Mixed                         | 2,320         | 65.4 (8.3)        | 0.18            | 0.05            | 2,463         | 60.4 (6.8)        | 0.08            | 0.02            |
| PLCO         | Prospective cohort            | 1,819         | 68.3 (6.4)        | 0.60            | NA              | 2,578         | 62.3 (5.2)        | 0.56            | NA              |
| PROCAS       | Population-based case-control | 244           | 62.1 (5.4)        | 0.07            | 0.04            | 1,265         | 61.8 (5.9)        | 0.07            | 0.03            |
| SASBAC       | Population-based case-control | 1,155         | 63.4 (6.4)        | 0.37            | 0.20            | 1,363         | 63.3 (6.3)        | 0.32            | 0.13            |
| SMC          | Prospective cohort            | 805           | 61.1 (7.7)        | 0.27            | NA              | 520           | 60.8 (7.8)        | 0.45            | NA              |
| UCIBCS       | Mixed                         | 259           | 66.9 (9.7)        | 0.23            | 0.07            | 165           | 62.6 (7.3)        | 0.42            | 0.11            |
| UKBGS        | Prospective cohort            | 648           | 60.4 (6.9)        | 0.25            | NA              | 626           | 60.3 (6.9)        | 0.17            | NA              |
| USRT         | Mixed                         | 304           | 64.1 (8.3)        | 0.50            | NA              | 639           | 64.2 (8.5)        | 0.46            | NA              |
| WHI          | Prospective cohort            | 4,875         | 69.0 (7.4)        | 0.44            | 0.25            | 4,561         | 69.3 (7.4)        | 0.36            | 0.18            |
| <b>Total</b> |                               | <b>27,585</b> | <b>64.0 (8.2)</b> | <b>0.34</b>     | <b>0.19</b>     | <b>34,785</b> | <b>63.0 (7.7)</b> | <b>0.28</b>     | <b>0.13</b>     |

\* CBCS: Canadian Breast Cancer Study; CECILE CECILE Breast Cancer Study; CPSII: Cancer Prevention Study-II Nutrition Cohort; EPIC: European Prospective Investigation Into Cancer and Nutrition; GENICA: Gene Environment Interaction and Breast Cancer in Germany; KARMA: Karolinska Mammography Project for Risk Prediction of Breast Cancer -

Cohort Study; MARIE: Mammary Carcinoma Risk Factor Investigation; MCBCS: Mayo Clinic Breast Cancer Study; MCCS: Melbourne Collaborative Cohort Study; MEC: Multiethnic Cohort; MISS: Melanoma Inquiry of Southern Sweden; MMHS: Mayo Mammography Health Study; NCBCS: North Carolina Breast Cancer Study; NHS: Nurses' Health Study; NHS2: Nurses' Health Study 2; OFBCR: Ontario Familial Breast Cancer Registry; PBCS: NCI Polish Breast Cancer Study; PKARMA: Karolinska Mammography Project for Risk Prediction of Breast Cancer - Case-Control Study; PLCO: The Prostate, Lung, Colorectal and Ovarian Cancer Screening Trial; PROCAS: Predicting the Risk Of Cancer At Screening Study; SASBAC: Singapore and Sweden Breast Cancer Study; SMC: Swedish Mammography Cohort; UCIBCS: UCI Breast Cancer Study; UKBGS: UK Breakthrough Generations Study; USRT: US Radiologic Technologists Study; WHI: Women's Health Initiative Observational Study.

\*\* Current MHT use: Current use of menopausal hormone therapy; Current EPT use: Current use of estrogen + progesterone menopausal hormone therapy

Figure S1. Manhattan plot and quantile-quantile plot of genome-wide interaction of current use of menopausal hormone therapy on breast cancer risk among population-based studies only

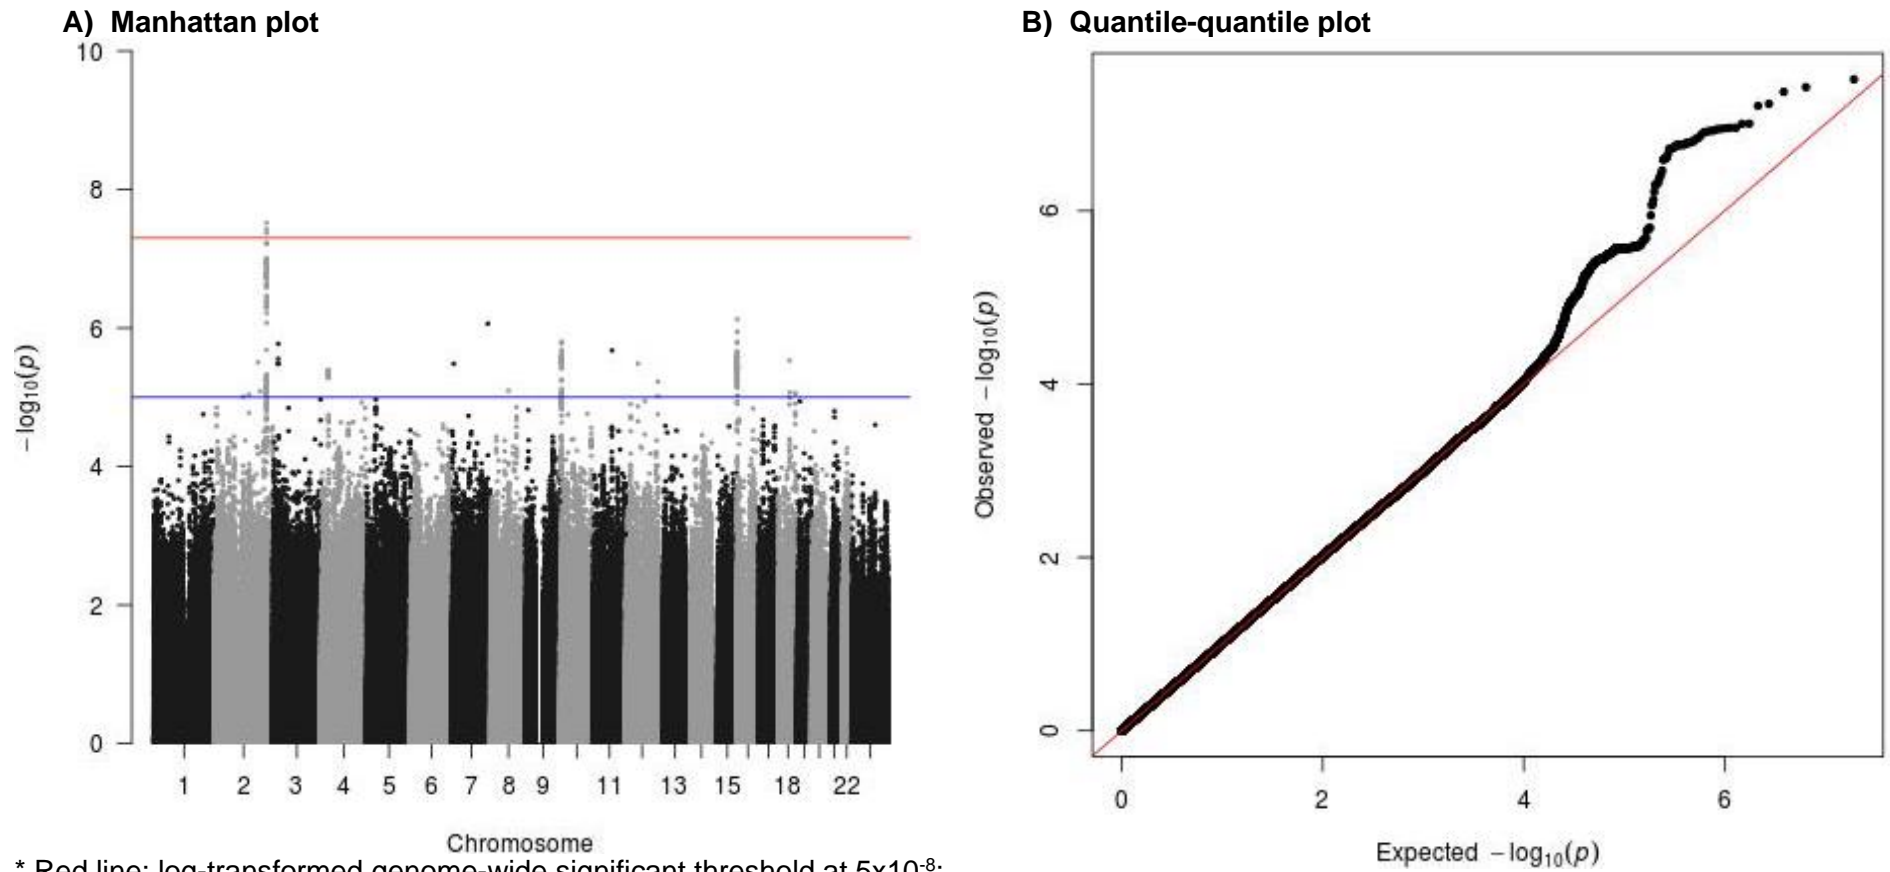

\* Red line: log-transformed genome-wide significant threshold at  $5 \times 10^{-8}$ ;  
Blue line: log-transformed suggestive threshold at  $1 \times 10^{-5}$ .

Figure S2. Manhattan plot and quantile-quantile plot of genome-wide interaction of current use of menopausal hormone therapy on estrogen-receptor positive breast cancer risk

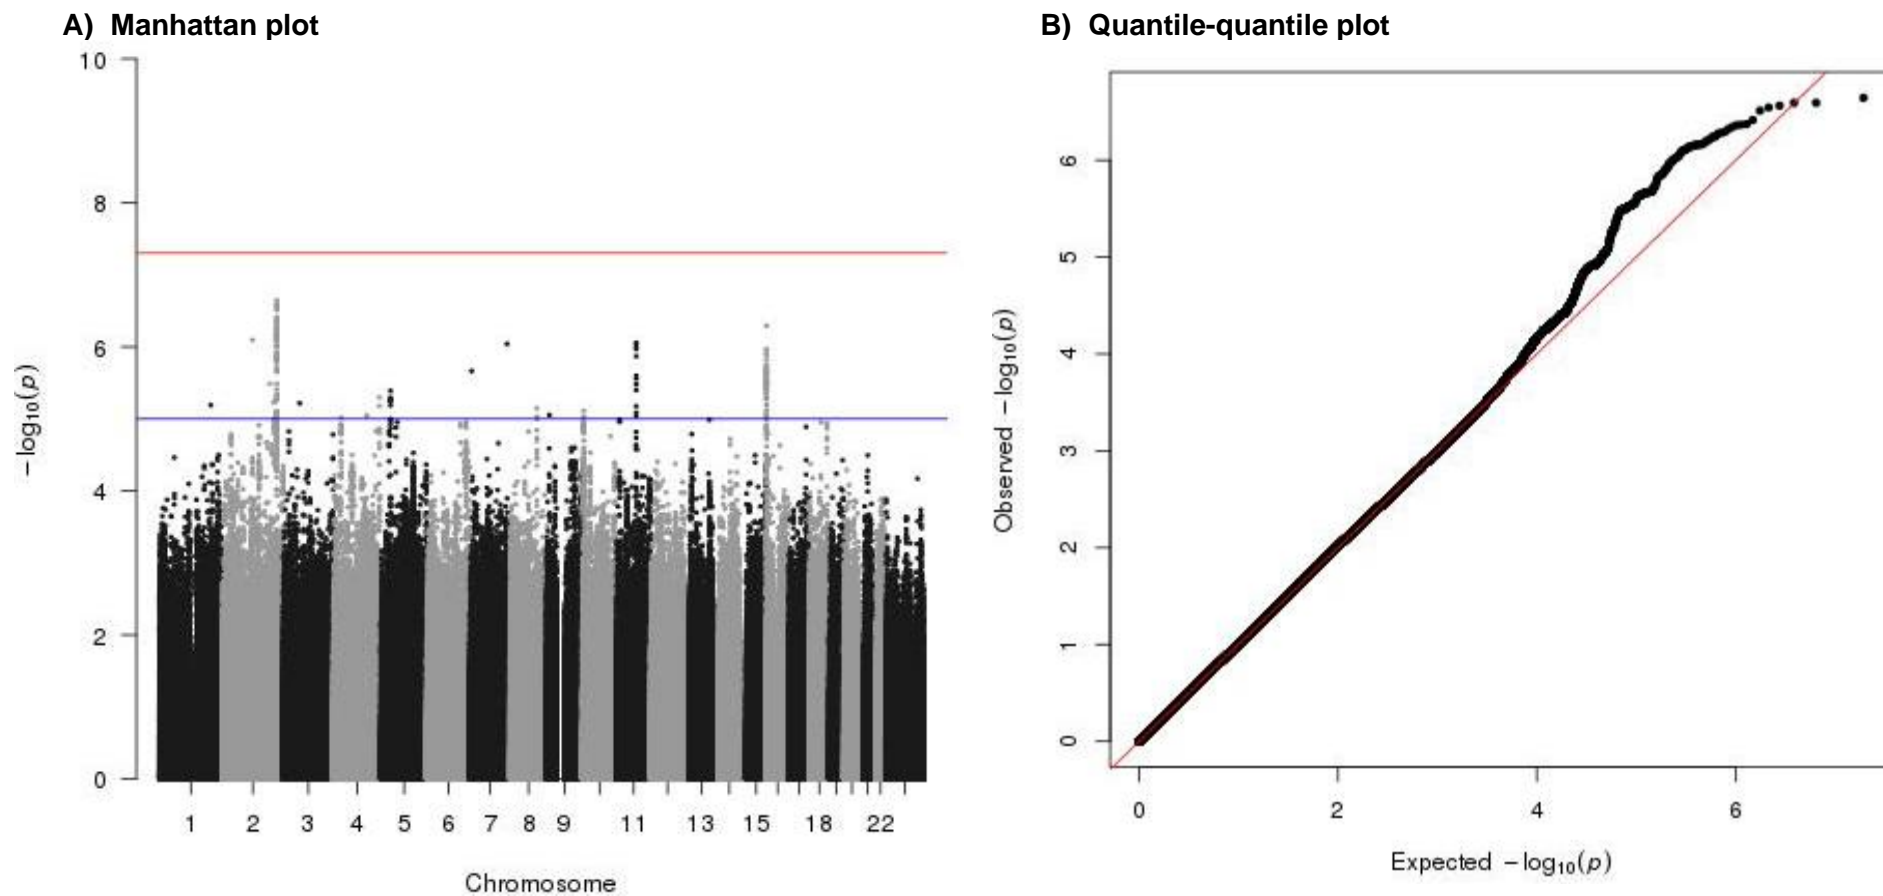

\* Red line: log-transformed genome-wide significant threshold at  $5 \times 10^{-8}$ ;  
Blue line: log-transformed suggestive threshold at  $1 \times 10^{-5}$ .

Figure S3. Quantile-quantile plots of genome-wide interaction of current use of menopausal hormone therapy on breast cancer risk

A) Current MHT use

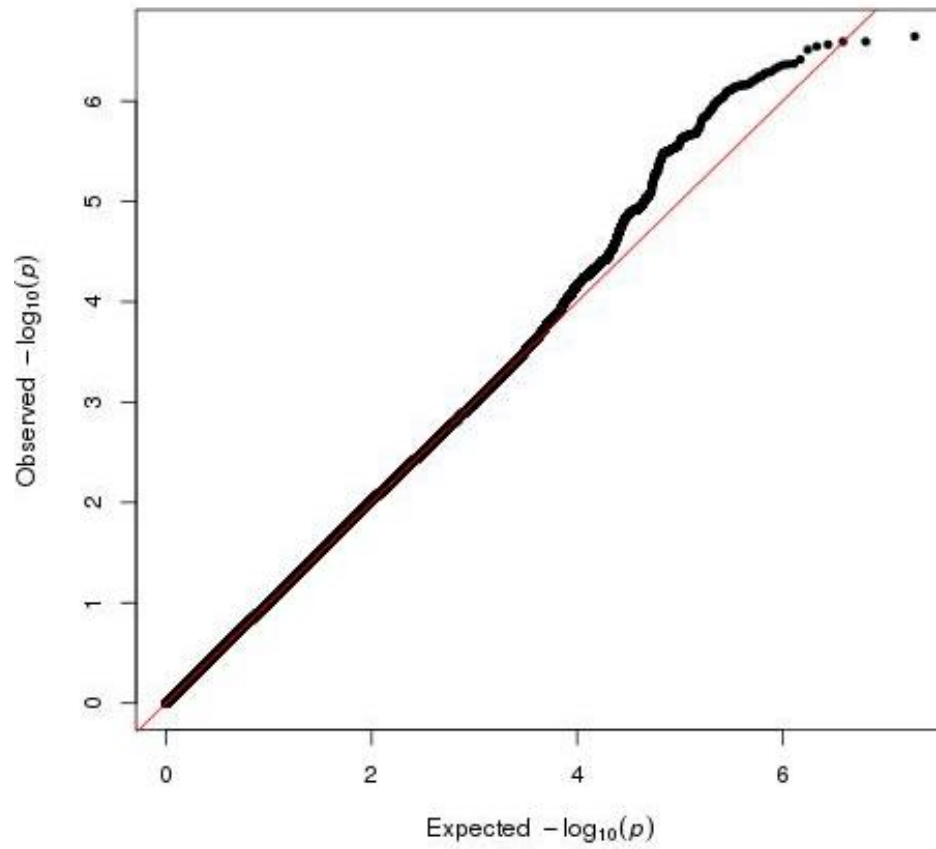

\* Genomic control factor  $\lambda=1.012$

B) Current EPT use

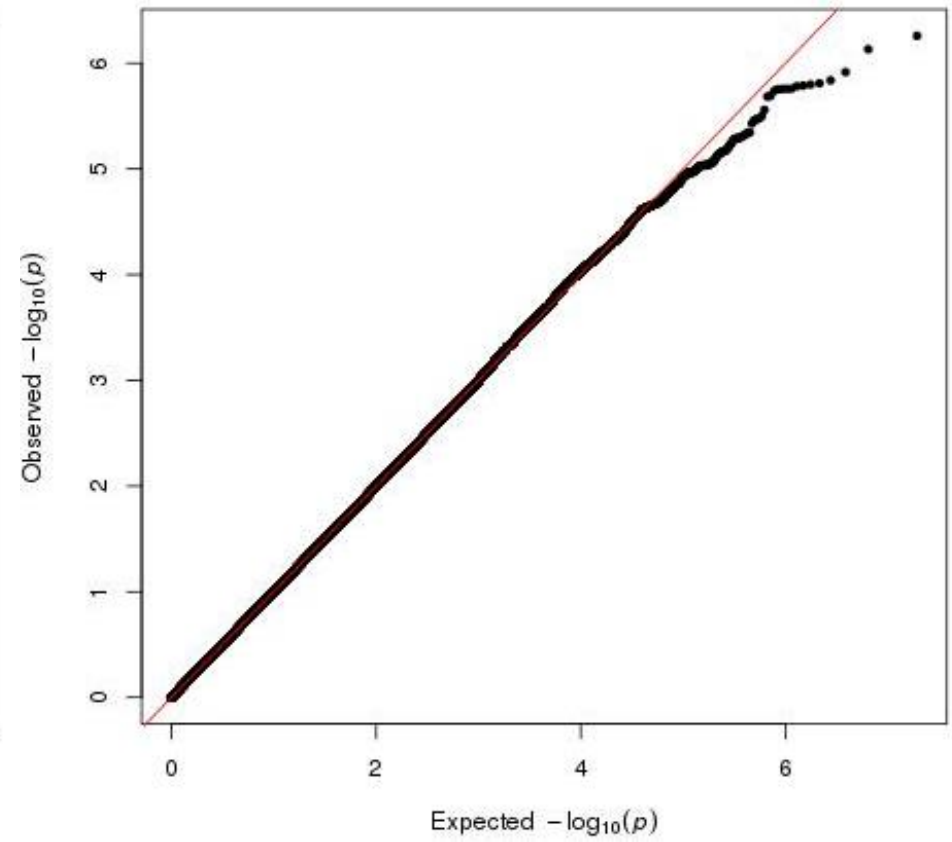

\* Genomic control factor  $\lambda=1.006$
